# Supplementary material for: Co9S8nanoparticles embedded in a N, S co-doped graphene-unzipped carbon nanotube composite as a high performance electrocatalyst for the hydrogen evolution reaction
Source: Royal Society of Chemistry journal article supplement (doi:10.1039/c6ta08955k), 2016-12-06
Supplement: c6ta08955k1.pdf [file c6ta08955k1.pdf]

## Supporting Information

### **Co<sub>9</sub>S<sub>8</sub> nanoparticles embedded in N, S co-doped graphene-unzipped carbon nanotubes composite as a high performance electrocatalyst for hydrogen evolution reaction**

Mengbo Li<sup>a,b</sup>, Haihui Zhou<sup>a,b</sup>, Wenji Yang<sup>a,b</sup>, Liang Chen<sup>a,b</sup>, Zheng Huang<sup>a,b</sup>, Ningshuang Zhang<sup>a,b</sup>, Chaopeng Fu<sup>\*a,b</sup>, Yafei Kuang<sup>\*a,b</sup>

<sup>a</sup>State Key Laboratory for Chemo/Biosensing and Chemometrics, Hunan University, Changsha, 410082, PR China

<sup>b</sup>College of Chemistry and Chemical Engineering, Hunan University, Changsha, 410082, PR China

\*Corresponding authors: Chaopeng Fu (fuchaopeng@hnu.edu.cn), Yafei Kuang (yafeik@163.com)

### **Synthesis of NG-UCNTs and RGO-UCNTs composites**

For synthesis of NG-UCNTs, 10 mg of O-UCNTs and 50 mg of GO were dispersed in 30 mL of water, then 4 mmol of urea were added to the suspension. The suspension was sonicated for approximately 2 h at room temperature to achieve a homogeneous suspension, which was dried at 80 °C afterwards. The obtained mixture was thermal treated at 300 °C for 2 h with a heating rate of 2 °C min<sup>-1</sup> under N<sub>2</sub> atmosphere, then the temperature was elevated to 800 °C at a heating rate of 10 °C min<sup>-1</sup> and kept for another 1 h. For comparison, RGO-UCNTs composite was synthesized through the identical procedure but without the addition of urea.

### **Synthesis of Co<sub>9</sub>S<sub>8</sub>/NSG-UCNTs composite with different mass ratios of GO/O-UCNTs**

60 mg mixture of GO and O-UCNTs, in which the weight ratio of GO/O-UCNTs was endowed with different values (1:0, 10:1, 3:1, 1:1, 1:3, 0:1), were dispersed in 30 mL of water, then 0.5 mmol of Co(NO<sub>3</sub>)<sub>2</sub>·6H<sub>2</sub>O and 4 mmol of urea were added to the suspension. The suspension was sonicated for approximately 2 h at room temperature to achieve a homogeneous suspension, which was dried at 80 °C afterwards. The obtained mixture was thermal treated at 300 °C for 2 h with a heating rate of 2 °C min<sup>-1</sup> under N<sub>2</sub> atmosphere, then the temperature was elevated to 800 °C at a heating rate of 10 °C min<sup>-1</sup> and kept for another 1 h.

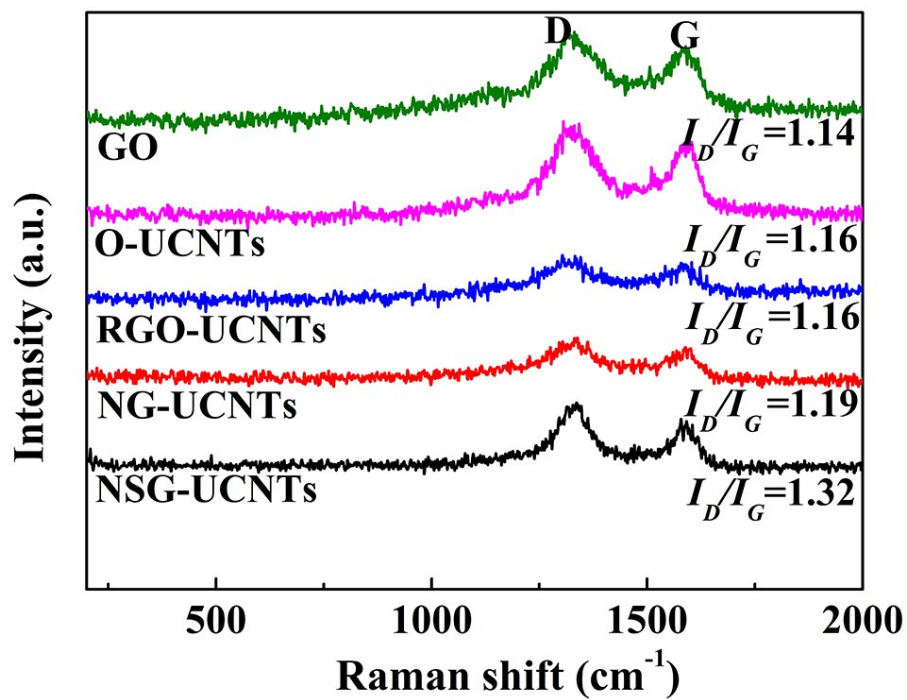

**Figure S1** Raman spectra of GO, O-UCNTs, RGO-UCNTs, NG-UCNTs, NSG-UCNTs

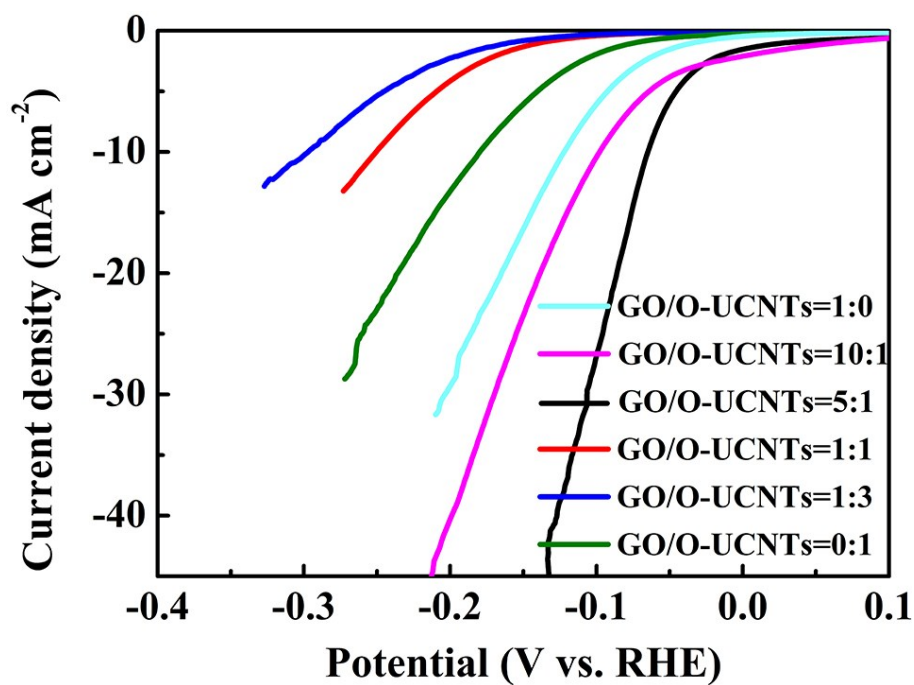

**Figure S2** Linear sweep voltammetry curves of  $\text{Co}_9\text{S}_8/\text{NSG-UCNTs}$  composites with different mass ratios of GO/O-UCNTs

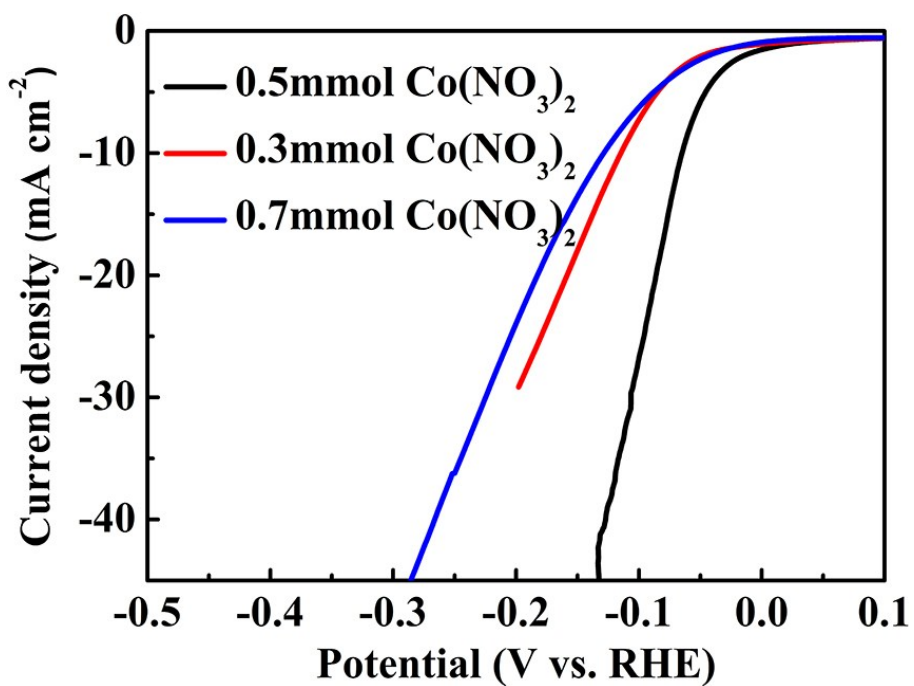

**Figure S3** Linear sweep voltammetry curves of  $\text{Co}_9\text{S}_8/\text{NSG-UCNTs}$  composites with different concentrations of  $\text{Co}(\text{NO}_3)_2$

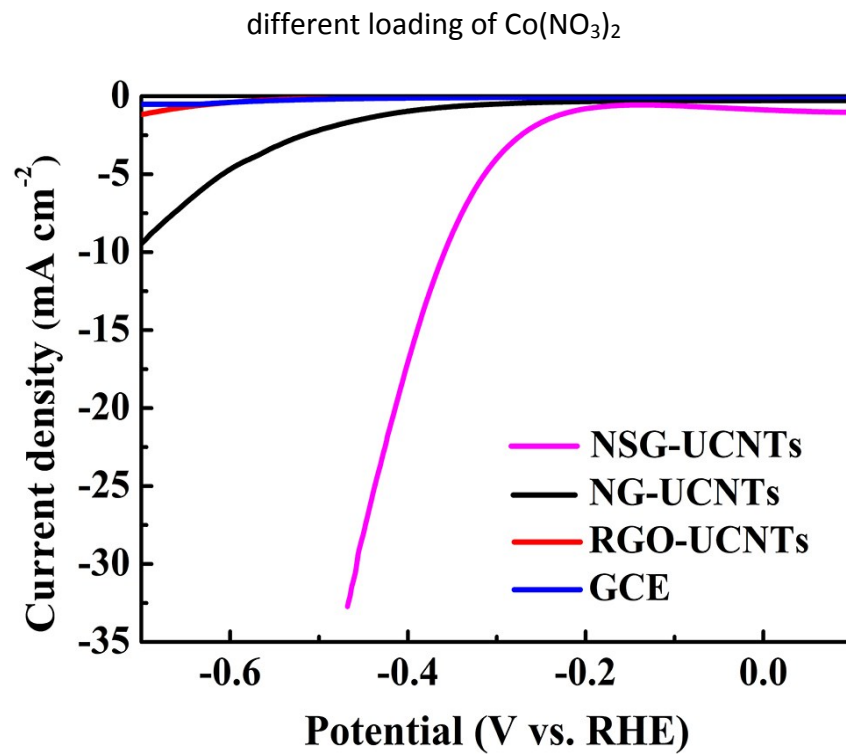

**Figure S4** Linear sweep voltammetry curves of NSG-UCNTs, NG-UCNTs, RGO-UCNTs measured in 0.5 M  $\text{H}_2\text{SO}_4$

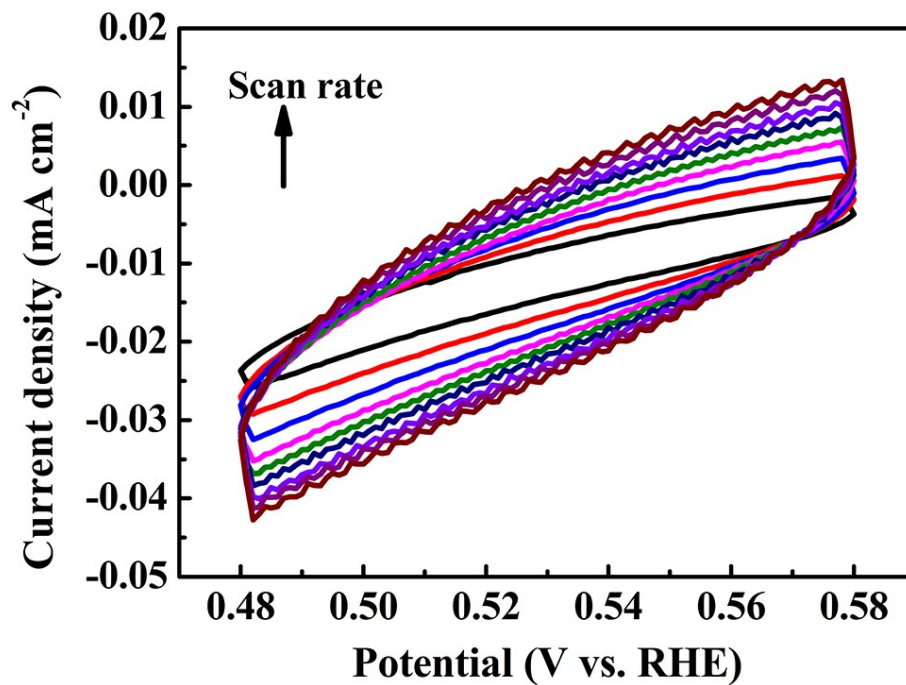

**Figure S5** Cyclic voltammograms (0.48–0.58 V) of the Co<sub>9</sub>S<sub>8</sub> in 0.5 M H<sub>2</sub>SO<sub>4</sub> at various scan rates

**Table S1** Comparison of the electrocatalytic activity of Co<sub>9</sub>S<sub>8</sub>/NSG-CNT for HER in acid media with some representative recently-reported non-noble metal electrocatalysts

| Catalyst                                                  | Electrode           | Electrolyte                          | Scan rate<br>(mV s <sup>-1</sup> ) | Loading<br>(mgcm <sup>-2</sup> ) | $\eta$ at various j<br>(mV) | Reference |
|-----------------------------------------------------------|---------------------|--------------------------------------|------------------------------------|----------------------------------|-----------------------------|-----------|
| Co <sub>9</sub> S <sub>8</sub> /NSG-CNT                   | GCE                 | 0.5 M H <sub>2</sub> SO <sub>4</sub> | 5                                  | 0.30                             | 65(10)                      | This work |
| Co <sub>9</sub> S <sub>8</sub> @C                         | GCE                 | 0.5 M H <sub>2</sub> SO <sub>4</sub> | 50                                 | 0.30                             | 240(10)                     | 1         |
| CoS <sub>2</sub> /RGO-CNT                                 | GCE                 | 0.5 M H <sub>2</sub> SO <sub>4</sub> | 2                                  | 0.28                             | 142(10)                     | 2         |
| CoP                                                       | Ti foil             | 0.5 M H <sub>2</sub> SO <sub>4</sub> | 2                                  | 2.0                              | 90(10)                      | 3         |
| CoS <sub>2</sub>                                          | graphite            | 0.5 M H <sub>2</sub> SO <sub>4</sub> | 3                                  | 1.7 ± 0.3                        | 145(10)                     | 4         |
| Fe <sub>0.37</sub> Co <sub>0.63</sub> S <sub>2</sub> /CNT | GCE                 | 0.5 M H <sub>2</sub> SO <sub>4</sub> | 1                                  | 0.4                              | 120(20)                     | 5         |
| P-WN/rGO                                                  | GCE                 | 0.5 M H <sub>2</sub> SO <sub>4</sub> | 5                                  | 0.337                            | 85(10)                      | 6         |
| NCo@G                                                     | GCE                 | 0.5 M H <sub>2</sub> SO <sub>4</sub> | 5                                  | -                                | 265(10)                     | 7         |
| Co@N-C                                                    | GCE                 | 1 M HClO <sub>4</sub>                | 2                                  | -                                | 200(10)                     | 8         |
| MoS <sub>x</sub> /NCNT                                    | GCE                 | 0.5 M H <sub>2</sub> SO <sub>4</sub> | 5                                  | 0.102                            | 110(10)                     | 9         |
| NG-Mo                                                     | NG                  | 0.1 M H <sub>2</sub> SO <sub>4</sub> | -                                  | 0.70                             | 140(10)                     | 10        |
| CoP/CNTs                                                  | GCE                 | 0.5 M H <sub>2</sub> SO <sub>4</sub> | 5                                  | 0.285                            | 130(10)                     | 11        |
| MoS <sub>2</sub> NA/CC                                    | CC                  | 0.5 M H <sub>2</sub> SO <sub>4</sub> | 2                                  | 0.96                             | 196(10)                     | 12        |
| Fe-Co <sub>2</sub> P/NCNTs                                | GCE                 | 0.5 M H <sub>2</sub> SO <sub>4</sub> | 5                                  | 0.2                              | 104(10)                     | 13        |
| CoMoS                                                     | GCE                 | 0.5 M H <sub>2</sub> SO <sub>4</sub> | 5                                  | 0.285                            | 200(61.9)                   | 14        |
| Cu-MoS <sub>2</sub> /rGO                                  | GCE                 | 0.5 M H <sub>2</sub> SO <sub>4</sub> | 5                                  | 0.285                            | 400(83.6)                   | 15        |
| MoS <sub>2</sub> /rGO                                     | GCE                 | 0.5 M H <sub>2</sub> SO <sub>4</sub> | 5                                  | 0.2                              | 200(23)                     | 16        |
| MoS <sub>2</sub> /rGO                                     | GCE                 | 0.5 M H <sub>2</sub> SO <sub>4</sub> | 2                                  | 0.285                            | 200(40)                     | 17        |
| MoS <sub>3</sub> /CNT                                     | silver<br>electrode | 1.0 M H <sub>2</sub> SO <sub>4</sub> | 1                                  | 1.6                              | 300(75)                     | 18        |
| NiP <sub>2</sub> NS/CC                                    | CC                  | 0.5 M H <sub>2</sub> SO <sub>4</sub> | 4                                  | 4.3                              | 75(10)                      | 19        |

## References

1. L.-L. Feng, G.-D. Li, Y. Liu, Y. Wu, H. Chen, Y. Wang, Y.-C. Zou, D. Wang and X. Zou, *ACS Appl. Mater. interfaces*, 2015, **7**, 980-988.
2. S. Peng, L. Li, X. Han, W. Sun, M. Srinivasan, S. G. Mhaisalkar, F. Cheng, Q. Yan, J. Chen and S. Ramakrishna, *Angew. Chem.*, 2014, **126**, 12802-12807.
3. Z. Pu, Q. Liu, P. Jiang, A. M. Asiri, A. Y. Obaid and X. Sun, *Chem. Mater.*, 2014, **26**, 4326-4329.
4. M. S. Faber, R. Dziedzic, M. A. Lukowski, N. S. Kaiser, Q. Ding and S. Jin, *J. Am. Chem. Soc.*, 2014, **136**, 10053-10061.

5. D.-Y. Wang, M. Gong, H.-L. Chou, C.-J. Pan, H.-A. Chen, Y. Wu, M.-C. Lin, M. Guan, J. Yang and C.-W. Chen, *J. Am. Chem.Soc.*, 2015, **137**, 1587-1592.
6. H. Yan, C. Tian, L. Wang, A. Wu, M. Meng, L. Zhao and H. Fu, *Angew. Chem.*, 2015, **127**, 6423-6427.
7. H. Fei, Y. Yang, Z. Peng, G. Ruan, Q. Zhong, L. Li, E. L. Samuel and J. M. Tour, *ACS Appl. Mater. interfaces*, 2015, **7**, 8083-8087.
8. J. Wang, D. Gao, G. Wang, S. Miao, H. Wu, J. Li and X. Bao, *J. Mater. Chem. A.*, 2014, **2**, 20067-20074
9. D. J. Li, U. N. Maiti, J. Lim, D. S. Choi, W. J. Lee, Y. Oh, G. Y. Lee and S. O. Kim, *Nano Lett.*, 2014, **14**, 1228-1233.
10. S. Chen, J. Duan, Y. Tang, B. Jin and S. Z. Qiao, *Nano Energy.*, 2015, **11**, 11-18.
11. Q. Liu, J. Tian, W. Cui, P. Jiang, N. Cheng, A. M. Asiri and X. Sun, *Angew. Chem.*, 2014, **126**, 6828-6832.
12. Q. Kong, X. Wang, A. Tang, W. Duan and B. Liu, *Mater. Lett.*, 2016, **177**, 139-142.
13. Y. Pan, Y. Liu, Y. Lin and C. G. Liu, *ACS Appl. Mater. interfaces*, 2016, **8**, 13890-13901.
14. X. Dai, K. Du, Z. Li, M. Liu, Y. Ma, H. Sun, X. Zhang and Y. Yang, *ACS Appl. Mater. interfaces*, 2015, **7**, 27242-27253.
15. F. Li, L. Zhang, J. Li, X. Lin, X. Li, Y. Fang, J. Huang, W. Li, M. Tian and J. Jin, *J. Power Sources*, 2015, **292**, 15-22.
16. X. Zheng, J. Xu, K. Yan, H. Wang, Z. Wang and S. Yang, *Chem. Mate.*, 2014, **26**, 2344-2353.
17. Y. Li, H. Wang, L. Xie, Y. Liang, G. Hong and H. Dai, *J. Am. Chem. Soc.*, 2011, **133**, 7296-7299.
18. T.-W. Lin, C.-J. Liu and J.-Y. Lin, *Appl. Catal., B: Environ.*, 2013, **134**, 75-82.
19. P. Jiang, Q. Liu and X. Sun, *Nanoscale*, 2014, **6**, 13440-13445.
